# Supplementary material for: A CMC-g-poly(AA-co-AMPS)/Fe3O4 hydrogel nanocomposite as a novel biopolymer-based catalyst in the synthesis of 1,4-dihydropyridines
Source: Royal Society of Chemistry journal article supplement (doi:10.1039/d3ra01389h), 2023-01-01
Supplement: d3ra01389h1.pdf [file d3ra01389h1.pdf]

## Supporting Information

# CMC-*g*-poly(AA-*co*-AMPS)/Fe<sub>3</sub>O<sub>4</sub> hydrogel nanocomposite as a novel biopolymer-based catalyst in the synthesis of 1,4-dihydropyridines

Elmira Hemmati<sup>1</sup>, Somayeh Soleimani-Amiri<sup>1\*</sup>, Mehran Kurdtabar<sup>1</sup>

<sup>1</sup>Department of Chemistry, Karaj Branch, Islamic Azad University, Karaj, Iran

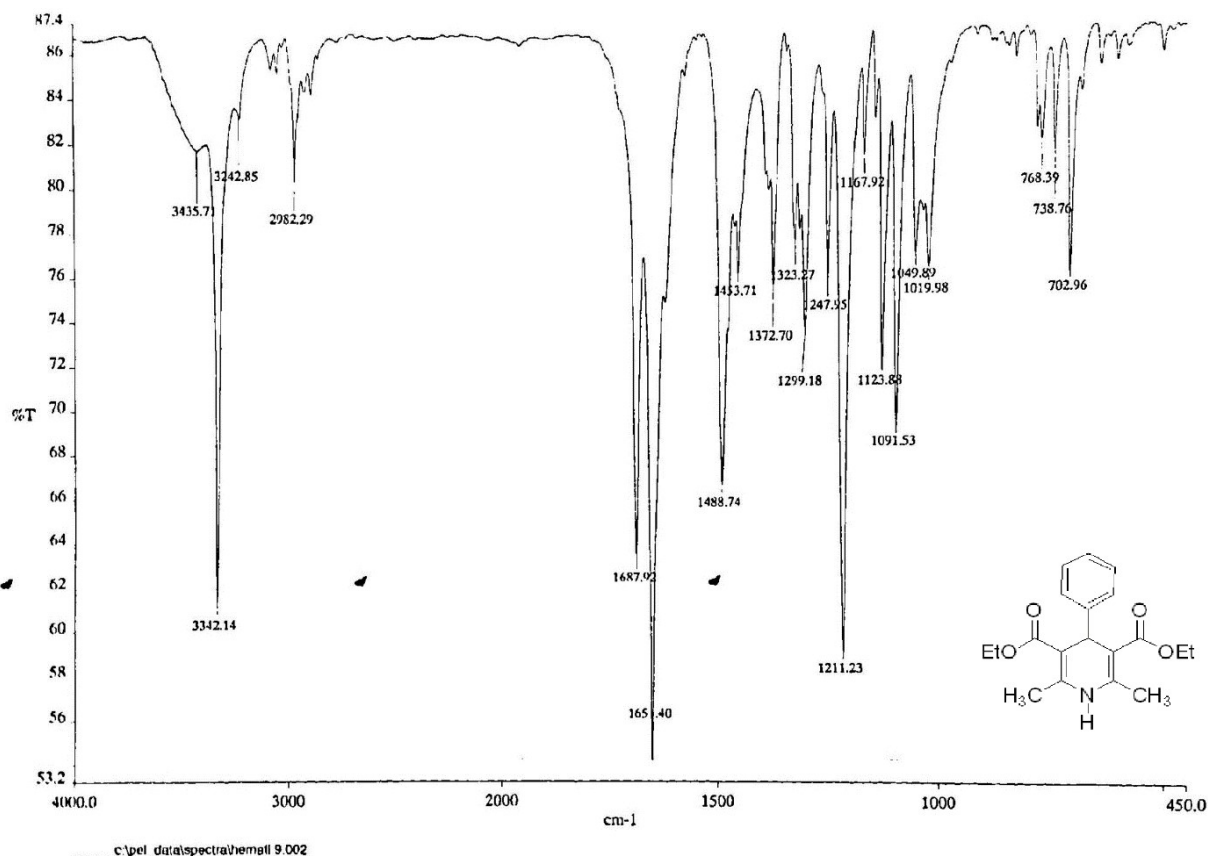

FT-IR of 4a

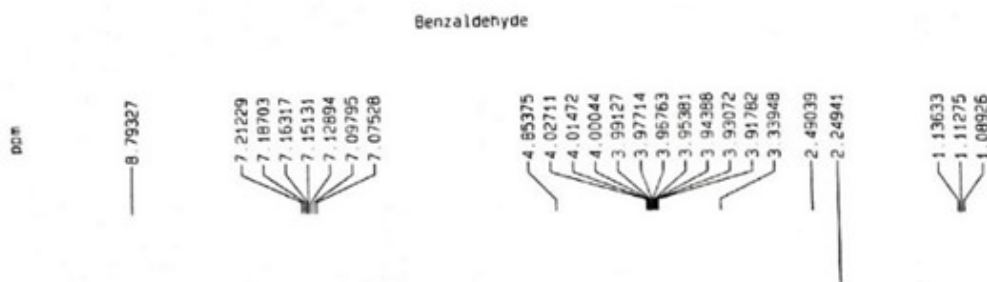

<sup>1</sup>HNMR of **4a**

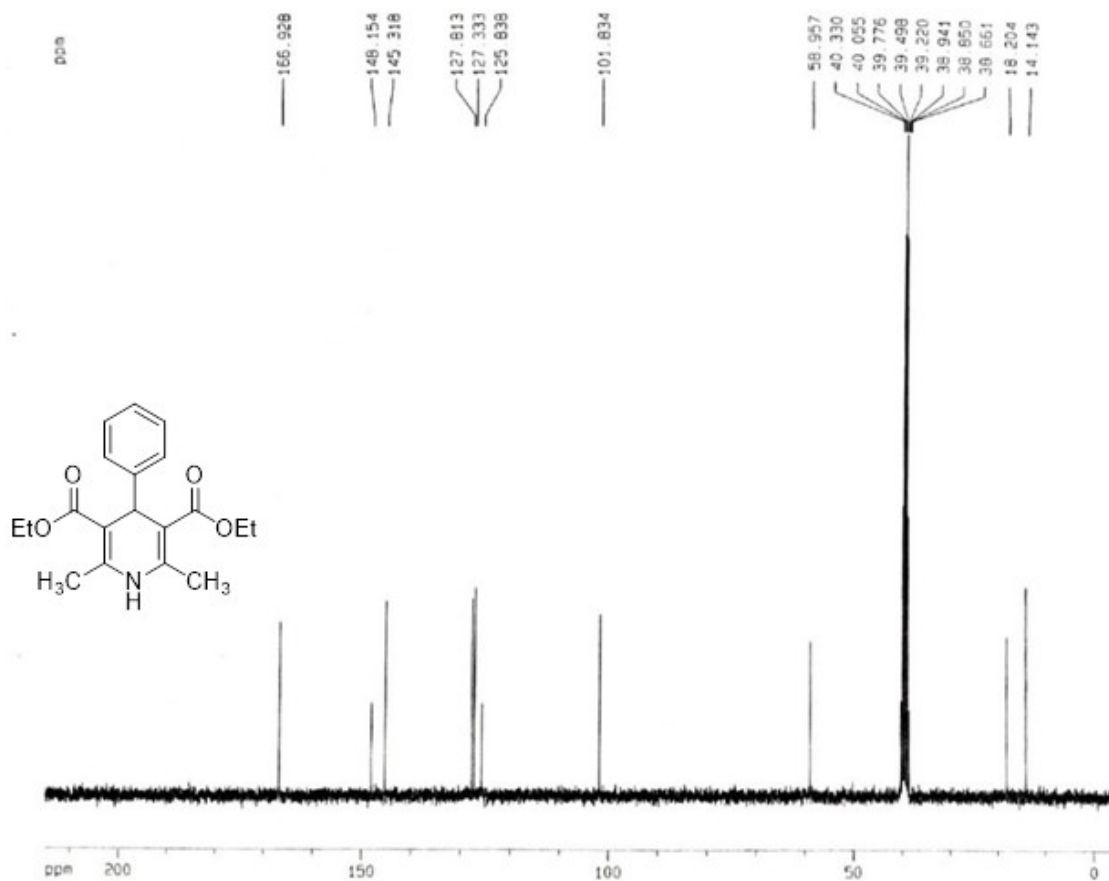

<sup>13</sup>CNMR of **4a**

\* Corresponding author.

E-mail addresses: s.soleimani@kiau.ac.ir (Somayeh Soleimani-Amiri).

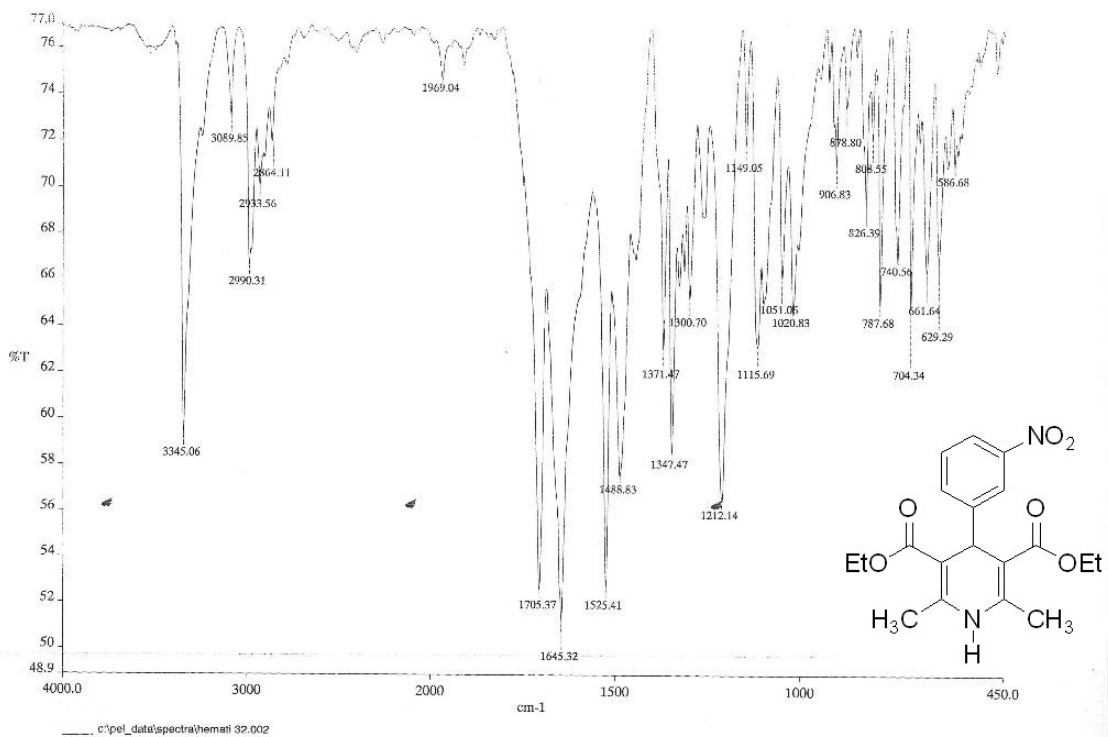

FT-IR of 4b

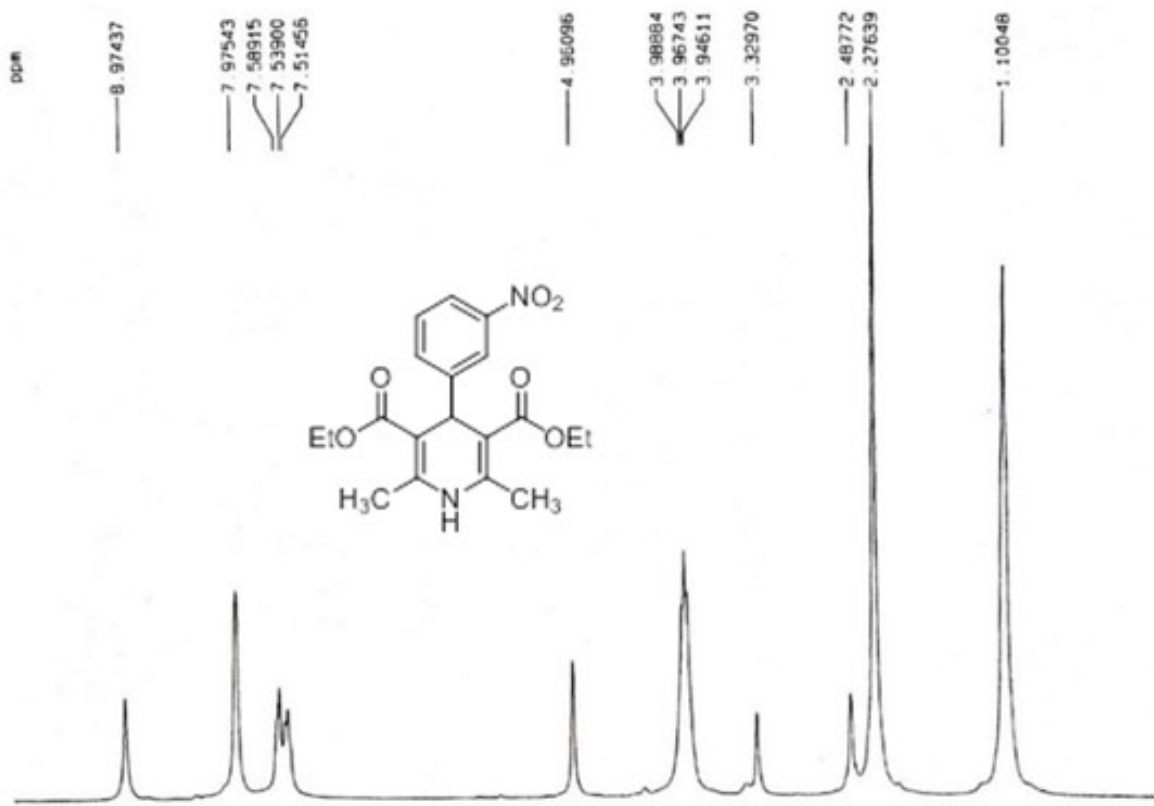

### <sup>1</sup>H NMR of 4b

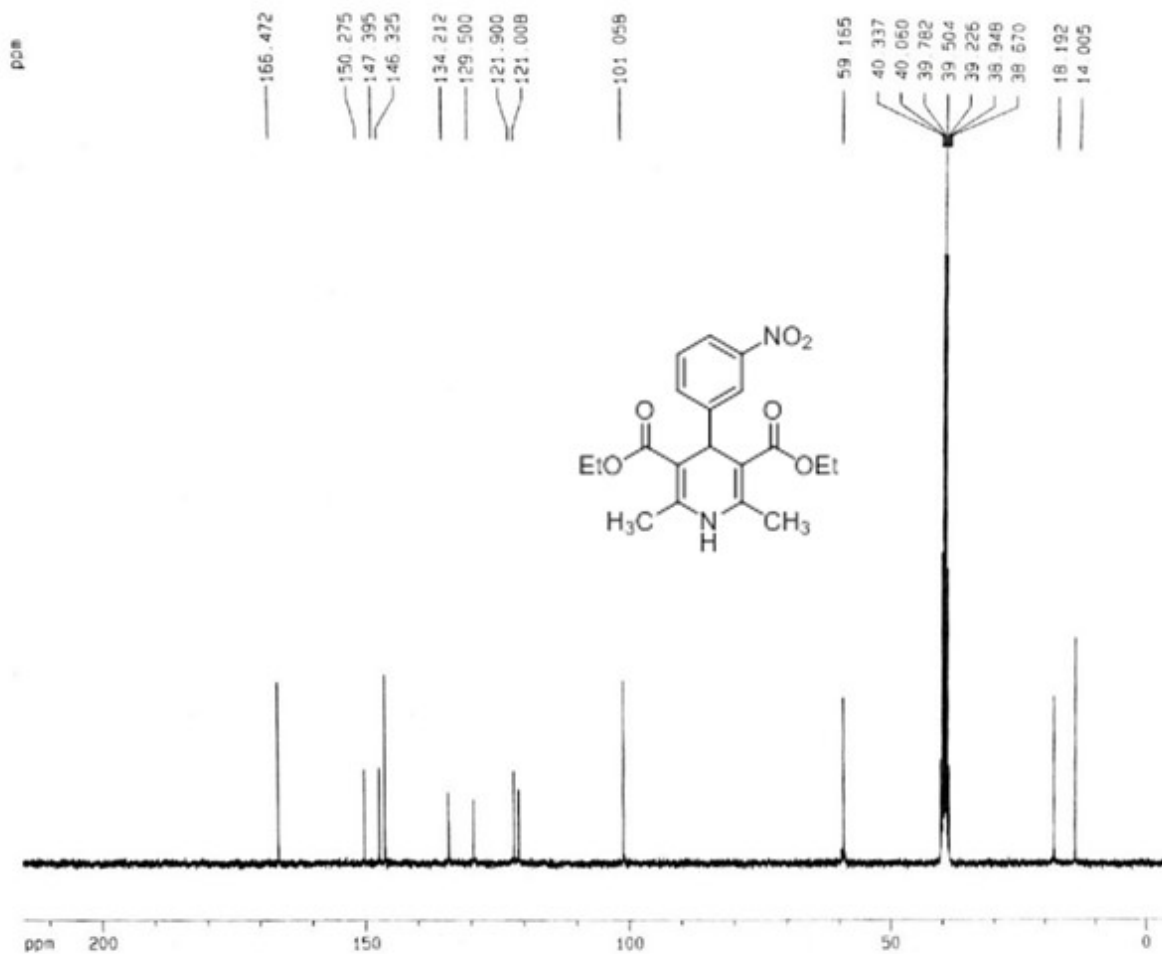

### <sup>13</sup>C NMR of 4b

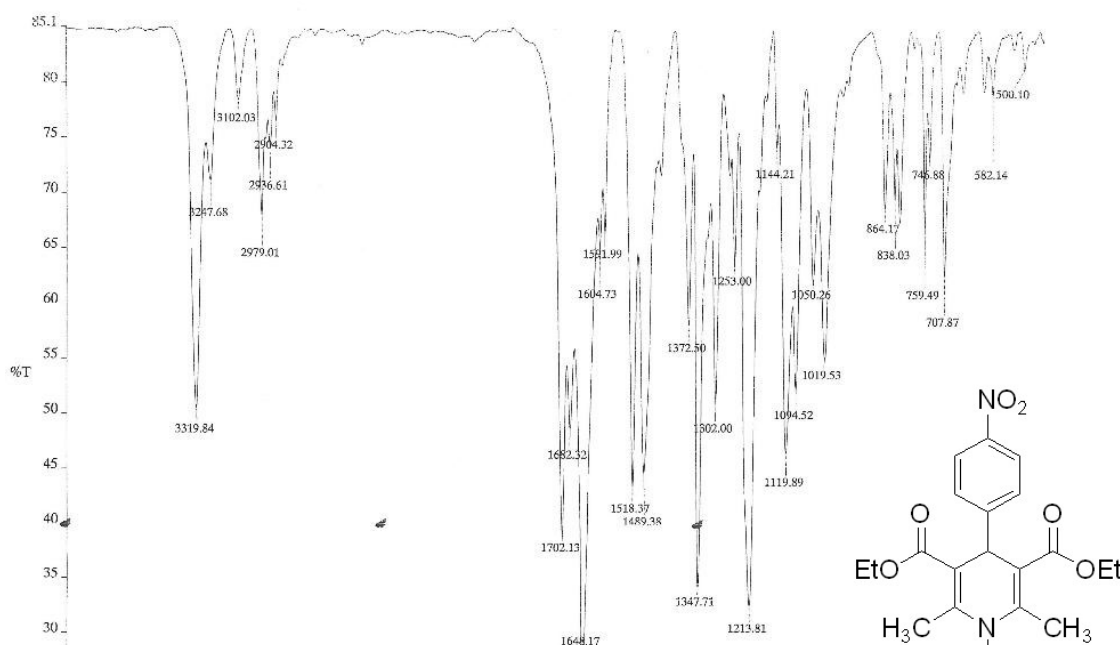

FT-IR of 4c

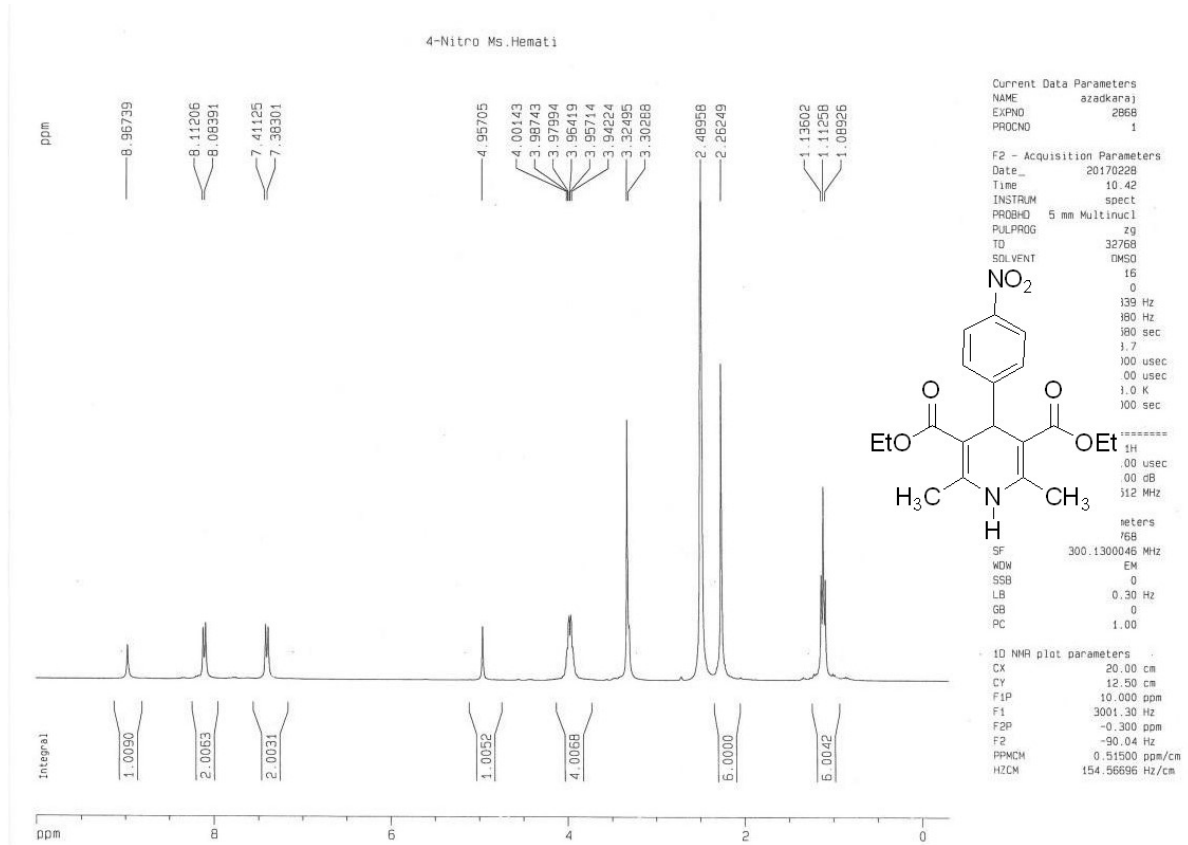

<sup>13</sup>C NMR of 4c

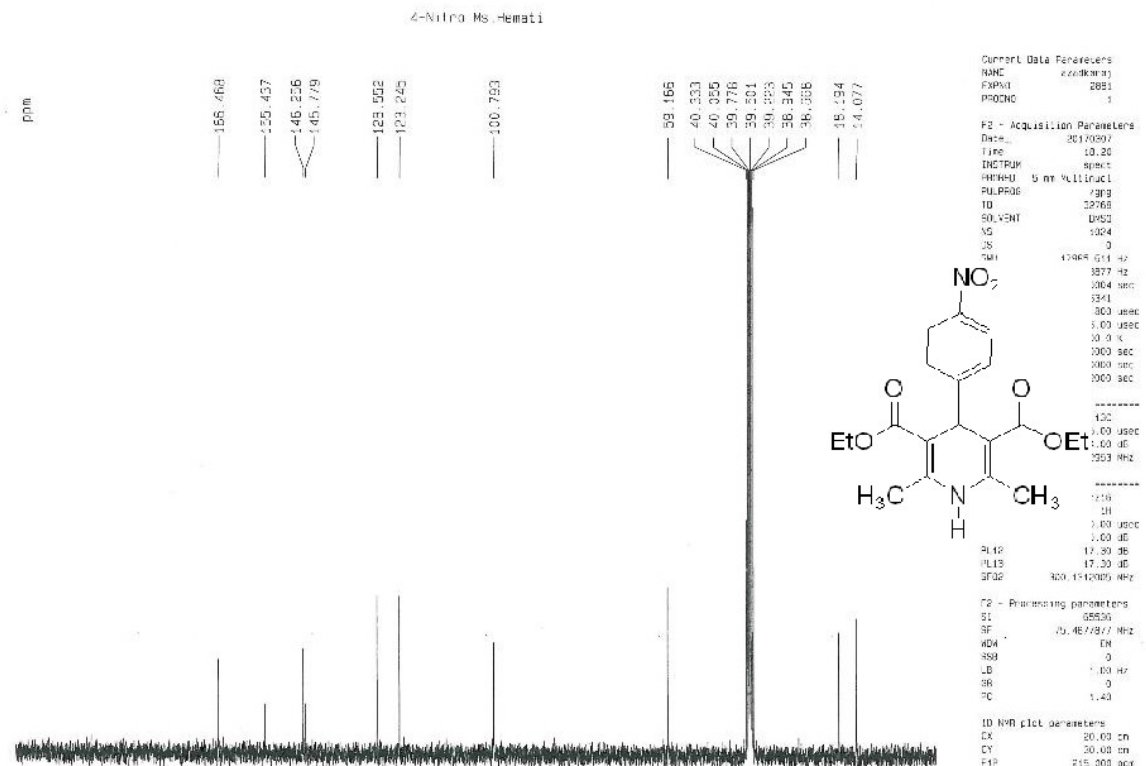

<sup>13</sup>CNMR of 4c

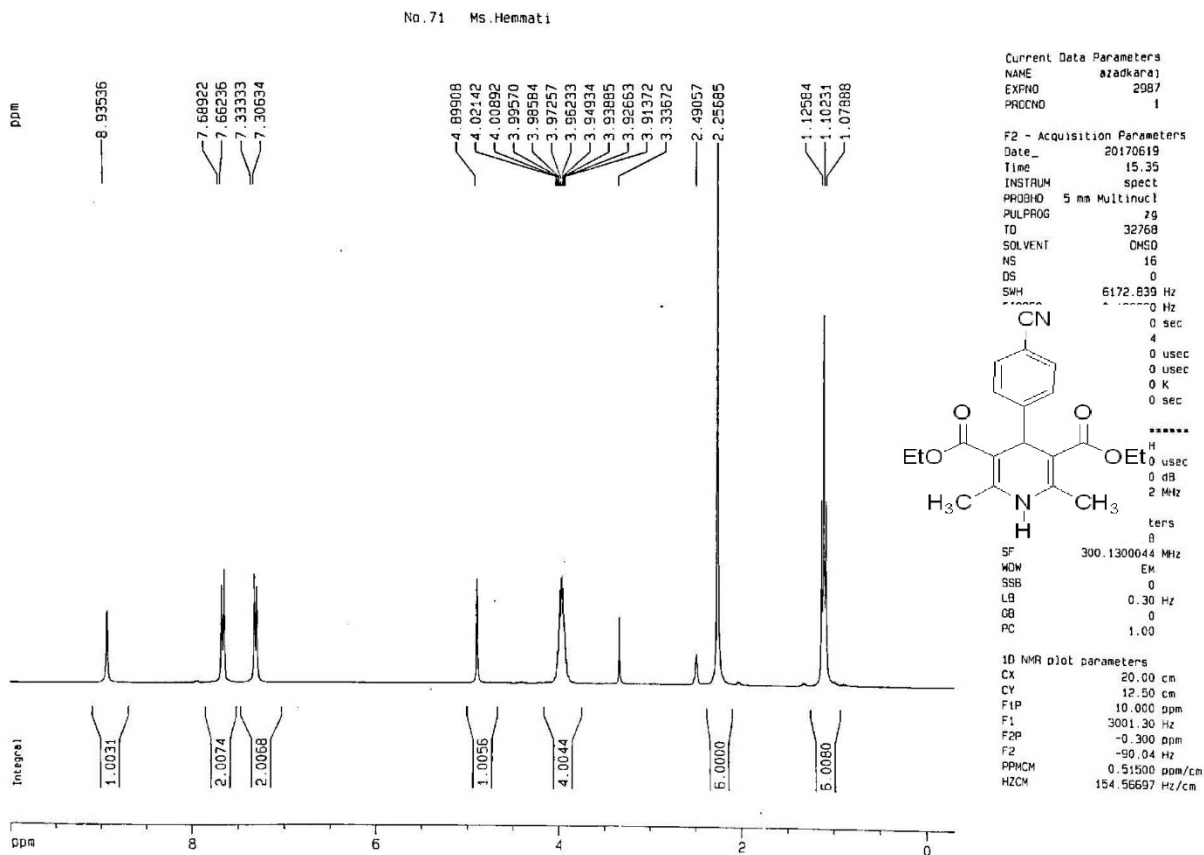

<sup>1</sup>HNMR of 4d

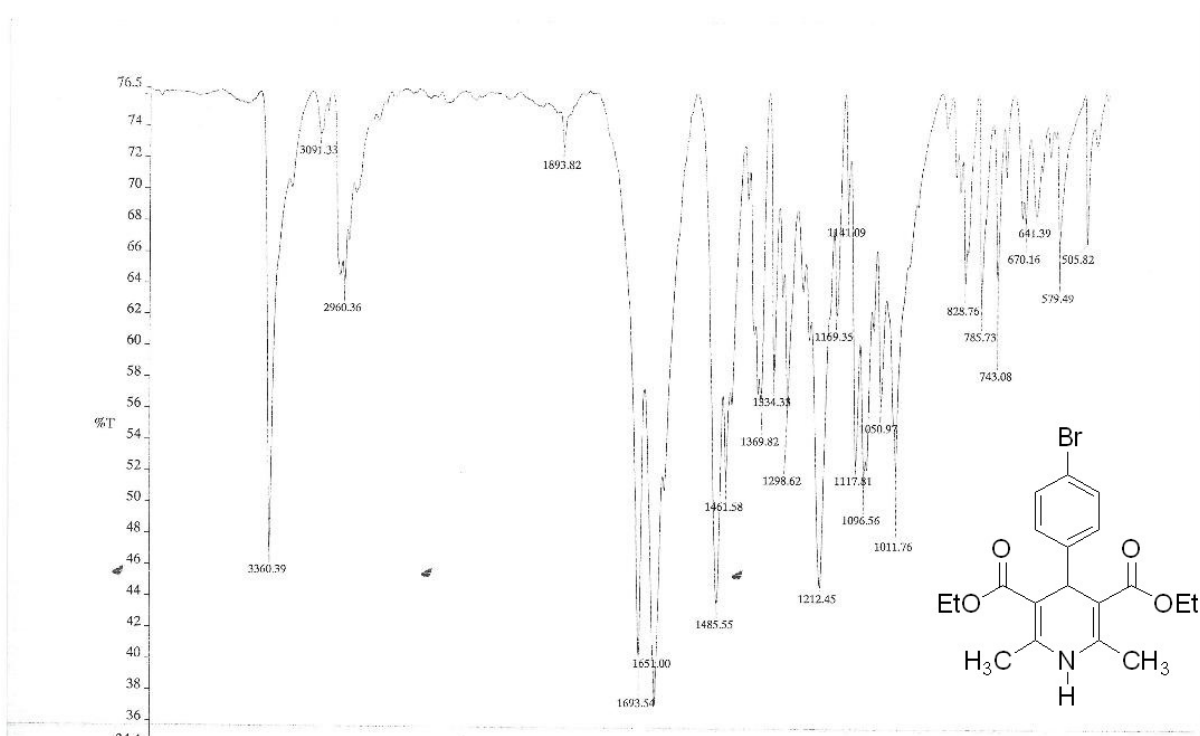

FT-IR of 4i

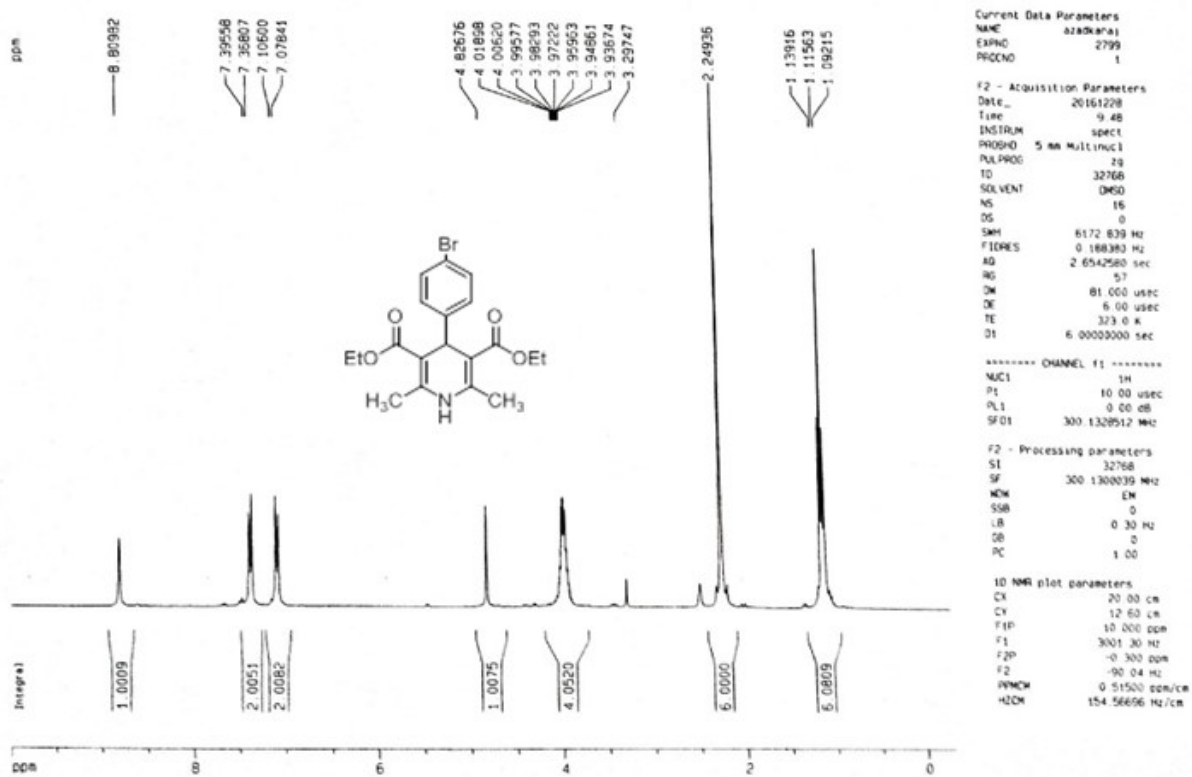

<sup>1</sup>H NMR of 4i

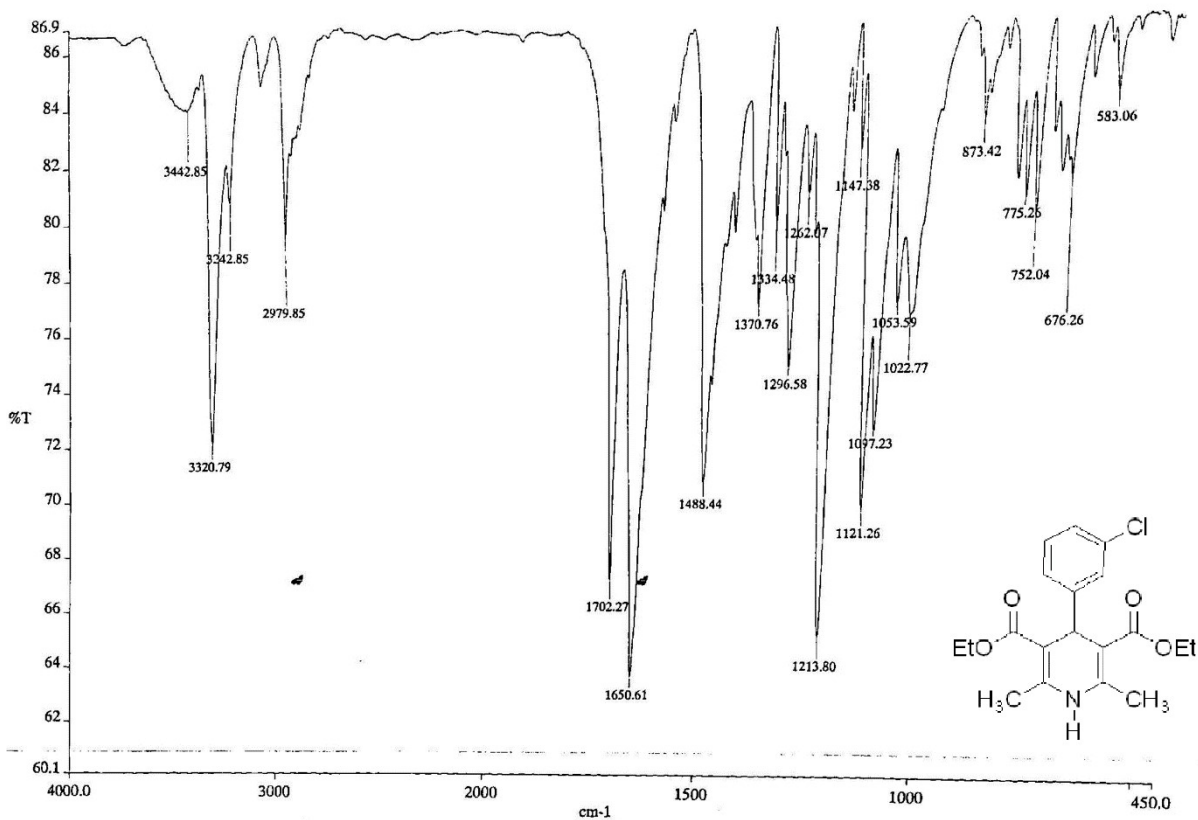

c:\pel\_data\spectra\hemati 42.004  
 FT-IR of 4f

No. 73 Ms.Hemmati

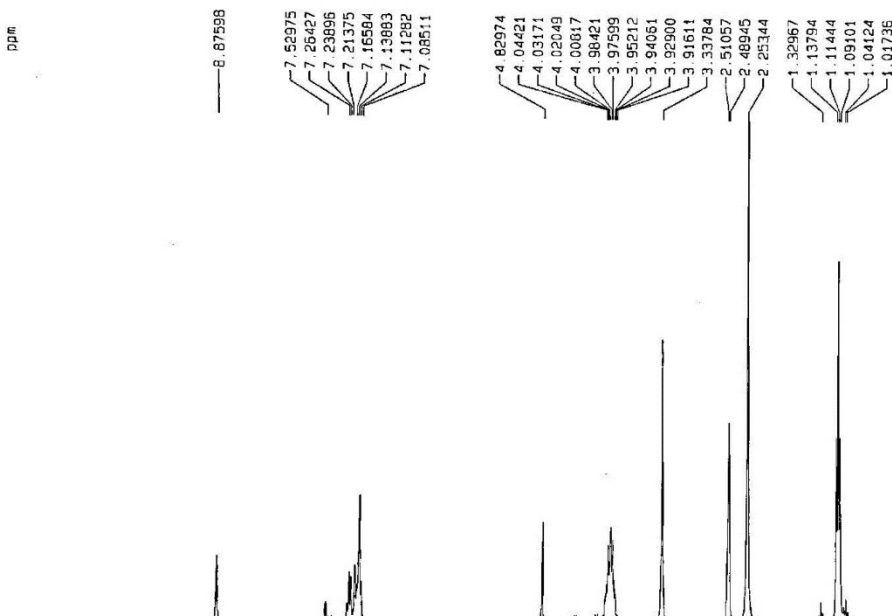

Current Data Parameters  
 NAME azadkaraj  
 EXPNO 2978  
 PROCNO 1

F2 - Acquisition Parameters  
 Date\_ 20170613  
 Time 8.15  
 INSTRUM spect  
 FPROBHD 5 mm Multinuc1  
 PULPROG zg  
 TD 32768  
 SOLVENT DMSO  
 NS 16  
 DS 0  
 SWH 5172.839 Hz  
 FIDRES 0.188360 Hz  
 AQ 2.6542580 sec  
 RG 80.6

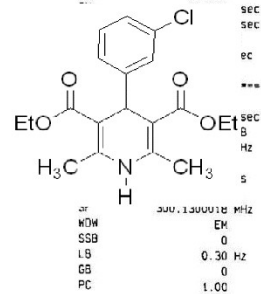



<sup>1</sup>HNMR of 4f

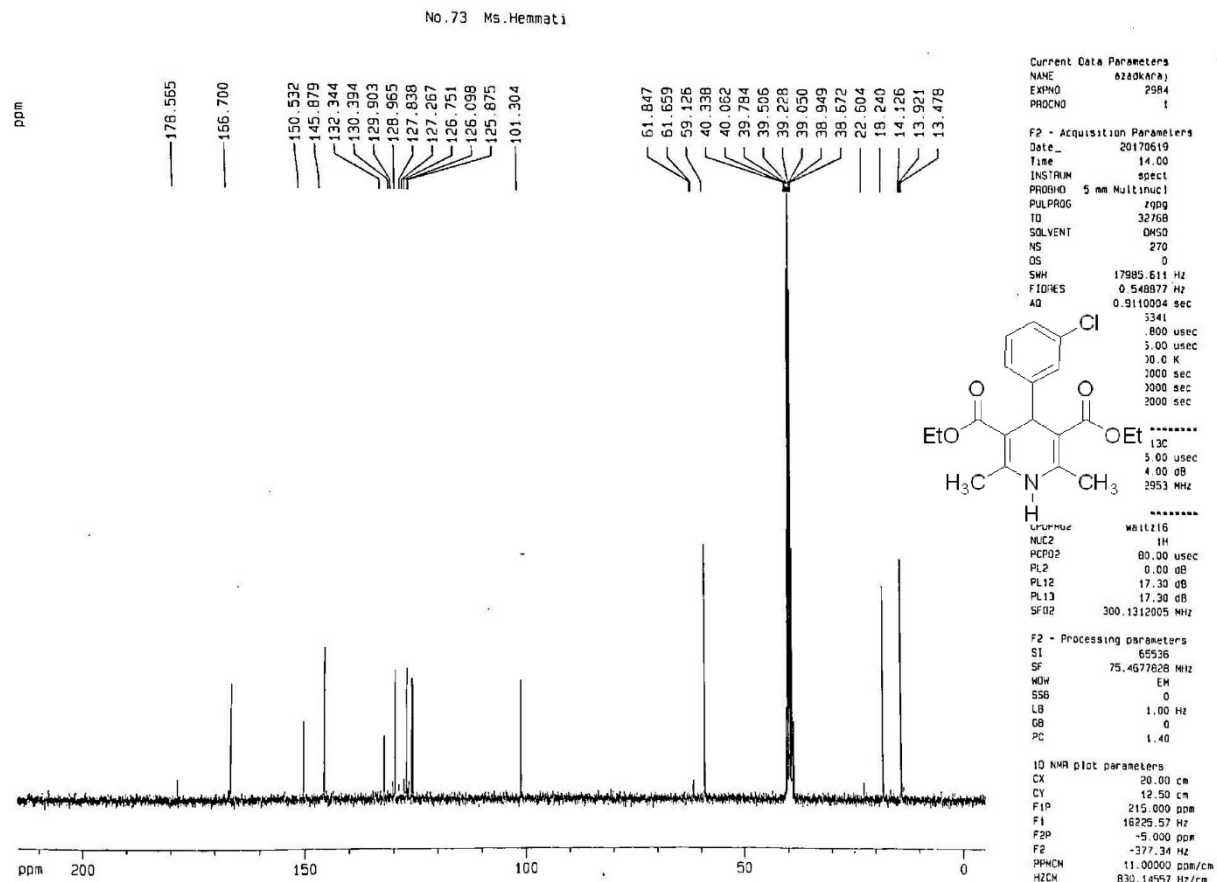

<sup>13</sup>CNMR of 4f

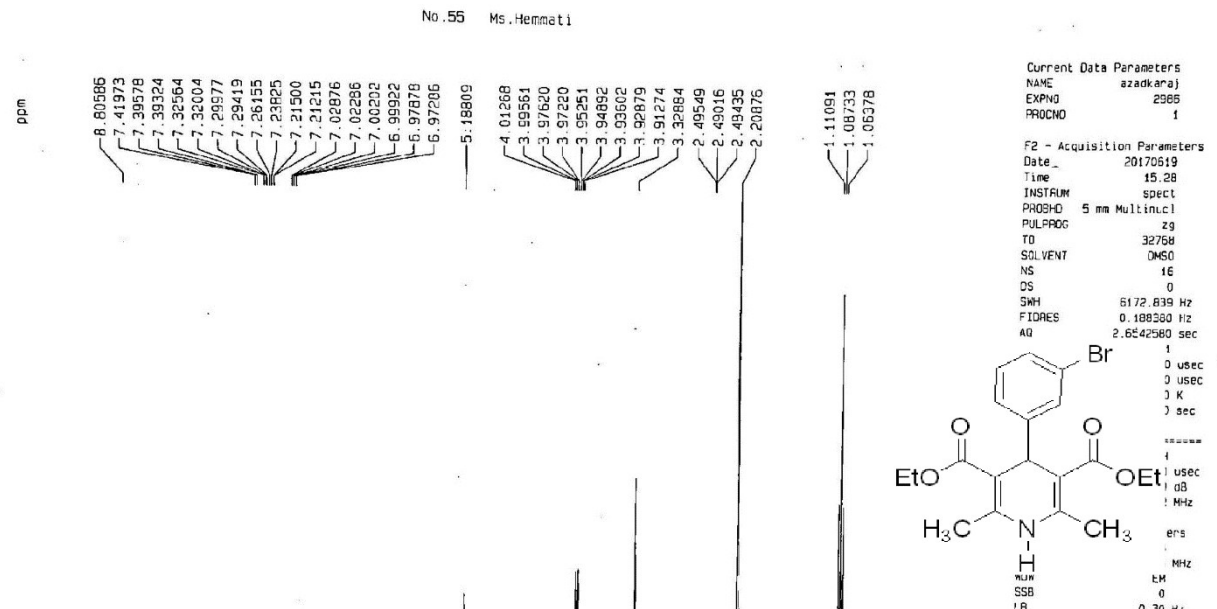



FT-IR of 4k

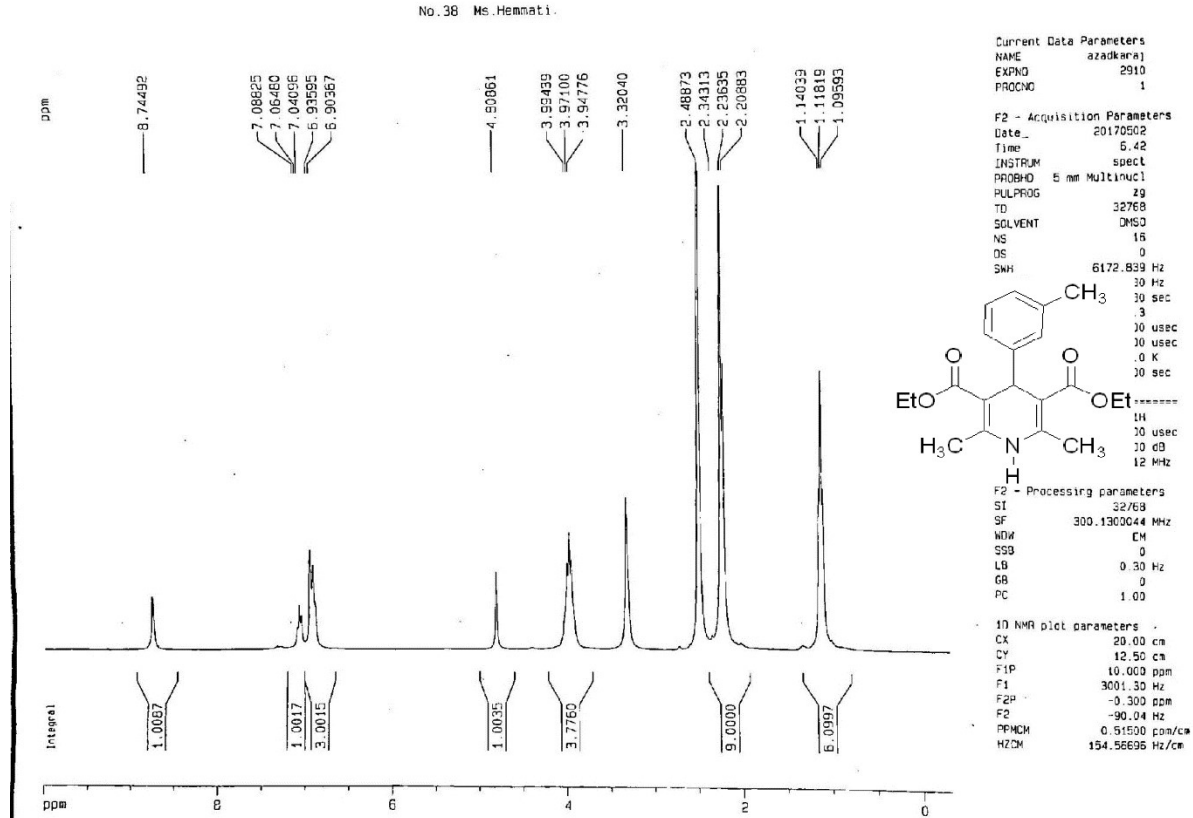

<sup>1</sup>H NMR of 4k

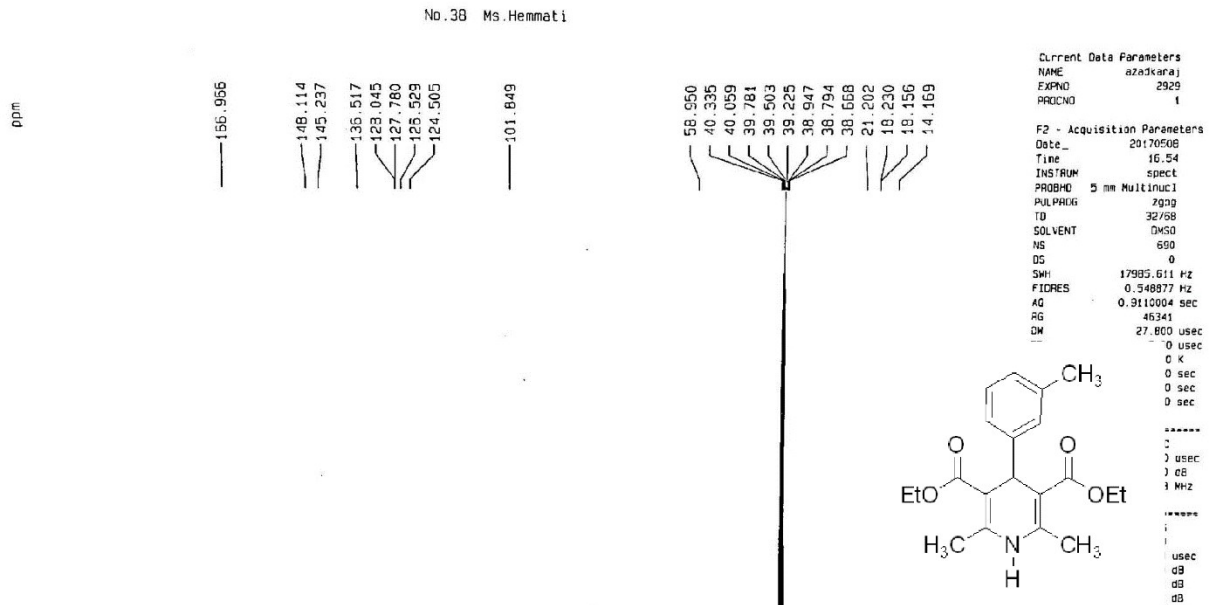

### $^{13}\text{C}$ NMR of **4k**

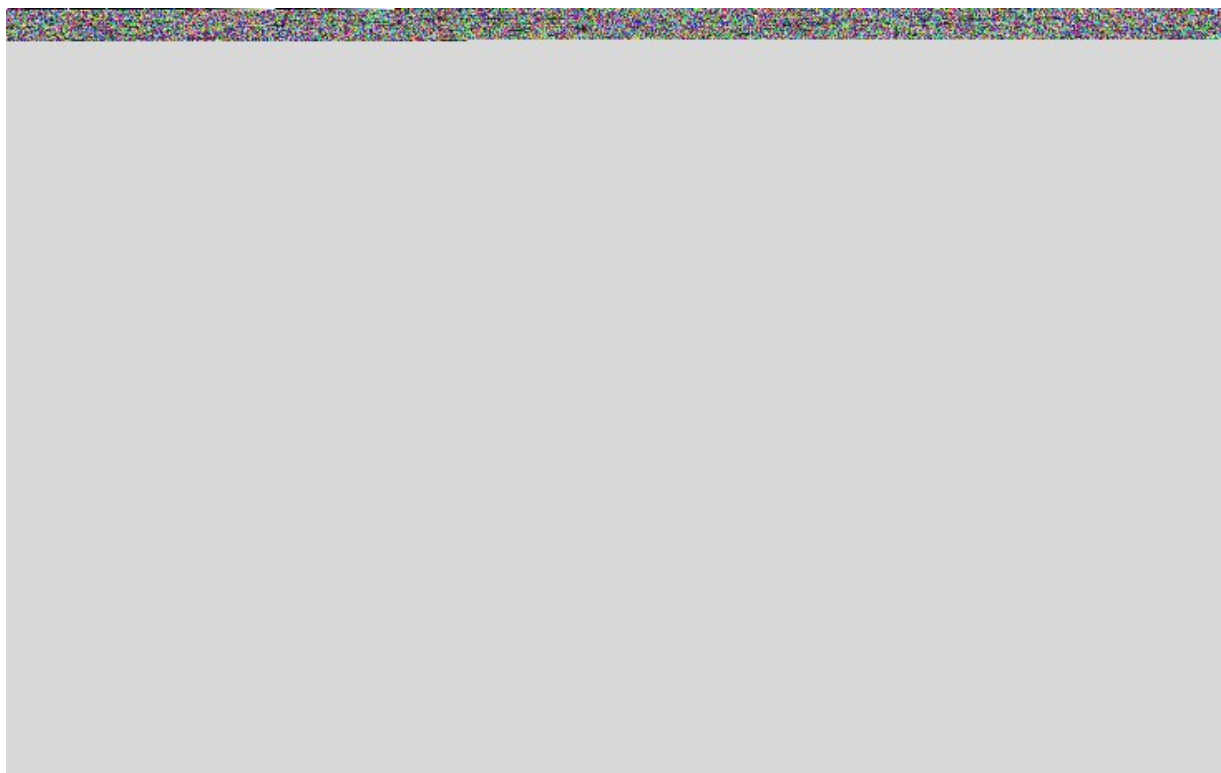

### $^1\text{H}$ NMR of **4l**

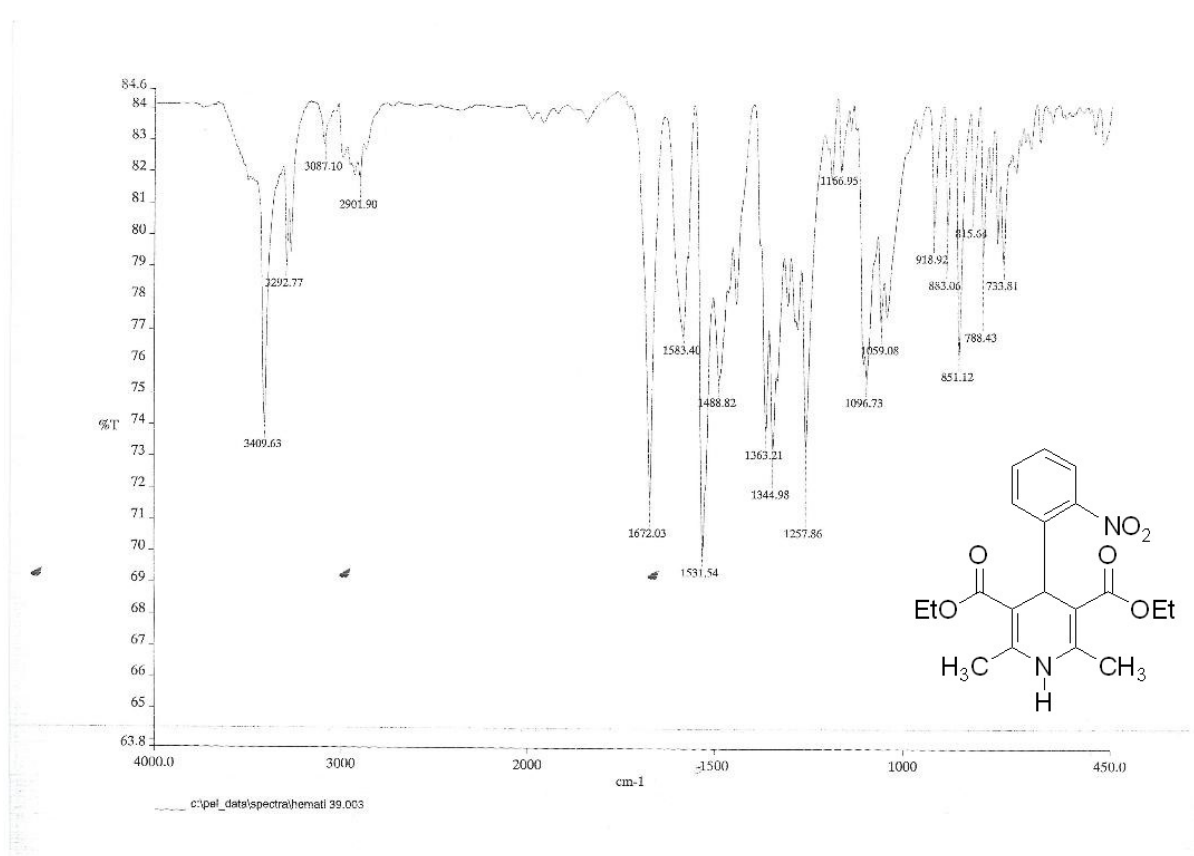

# FT-IR of 5d

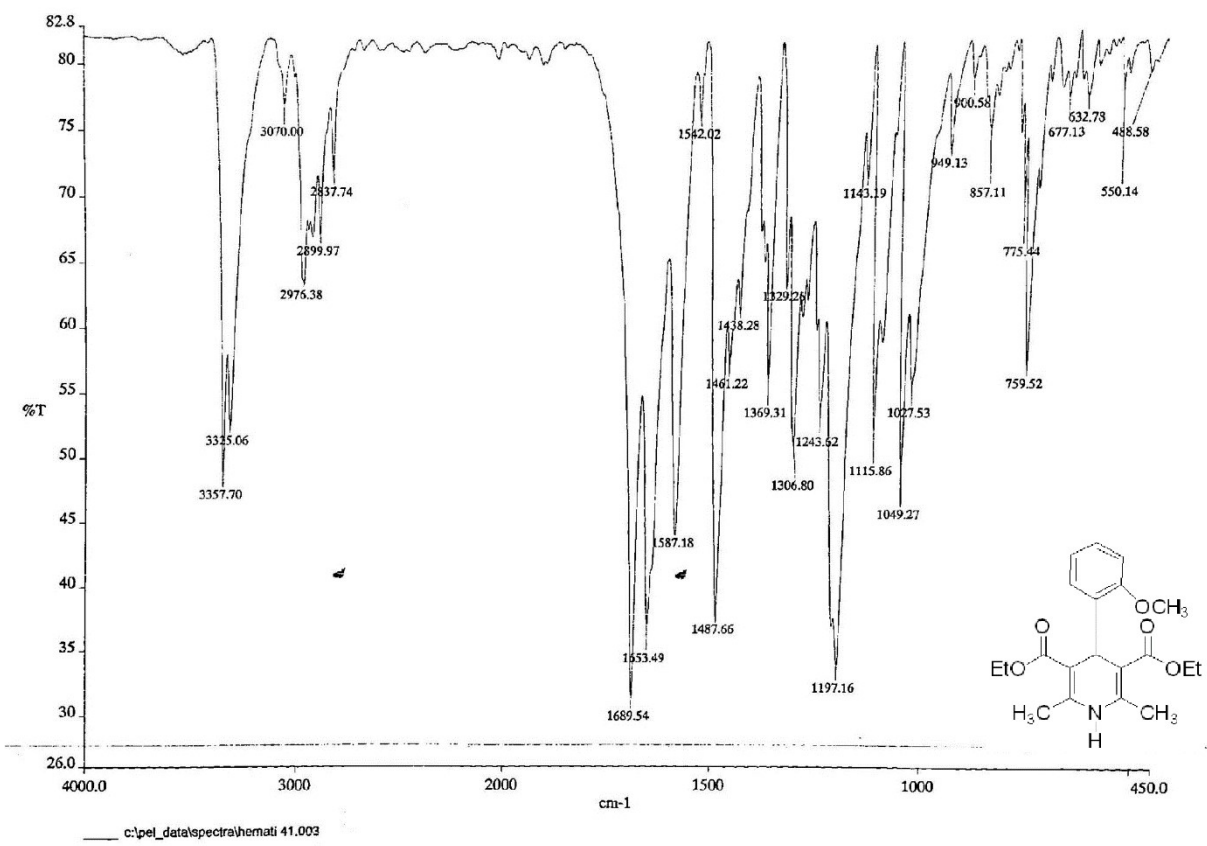

# FT-IR of 4m

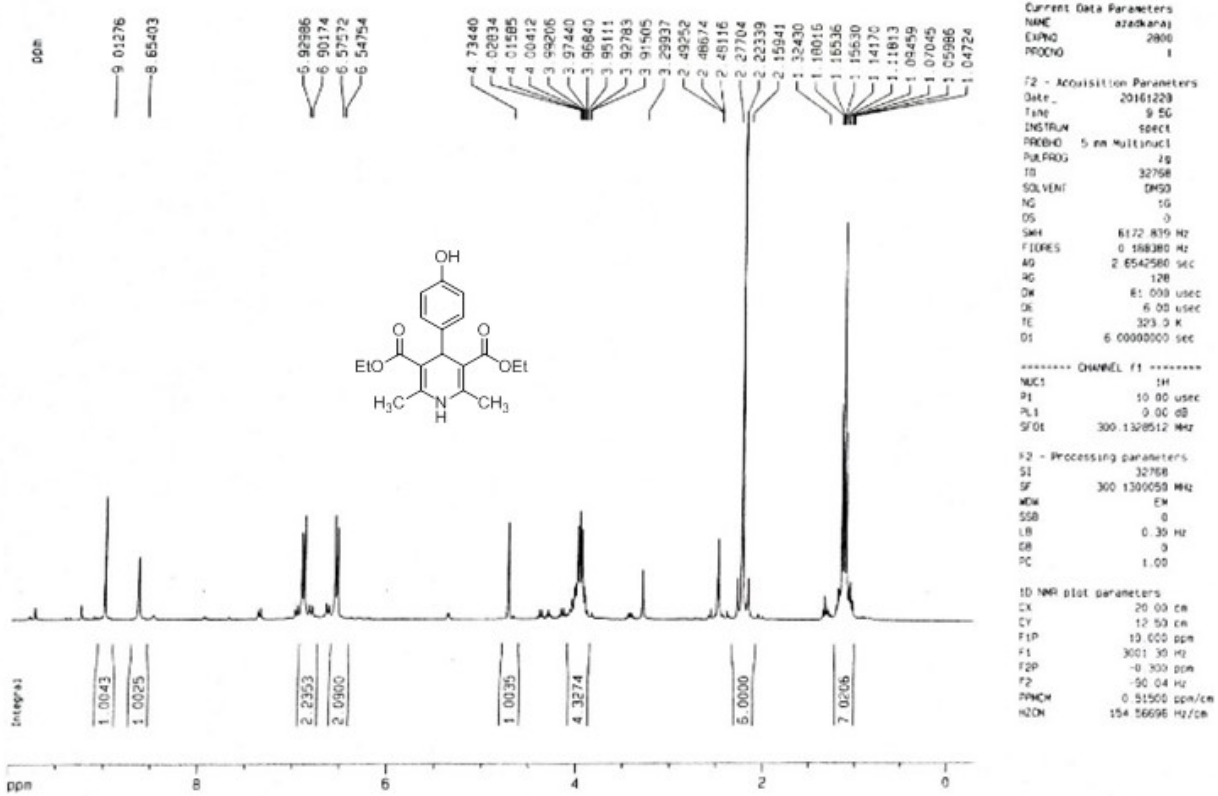

<sup>1</sup>H NMR of 4p

Figure S1: FT-IR, <sup>1</sup>H and <sup>13</sup>C NMR spectra of the 1,4-dihydropyridine (1,4-DHP) derivatives.
